# Supplementary material for: N-Acetylcysteine Antagonizes NGF Activation of TrkA through Disulfide Bridge Interaction, an Effect Which May Contribute to Its Analgesic Activity
Source: MDPI journal article supplement (doi:10.3390/ijms25010206), 2023-12-22
Supplement: s1 [file s1]

## Supplementary File

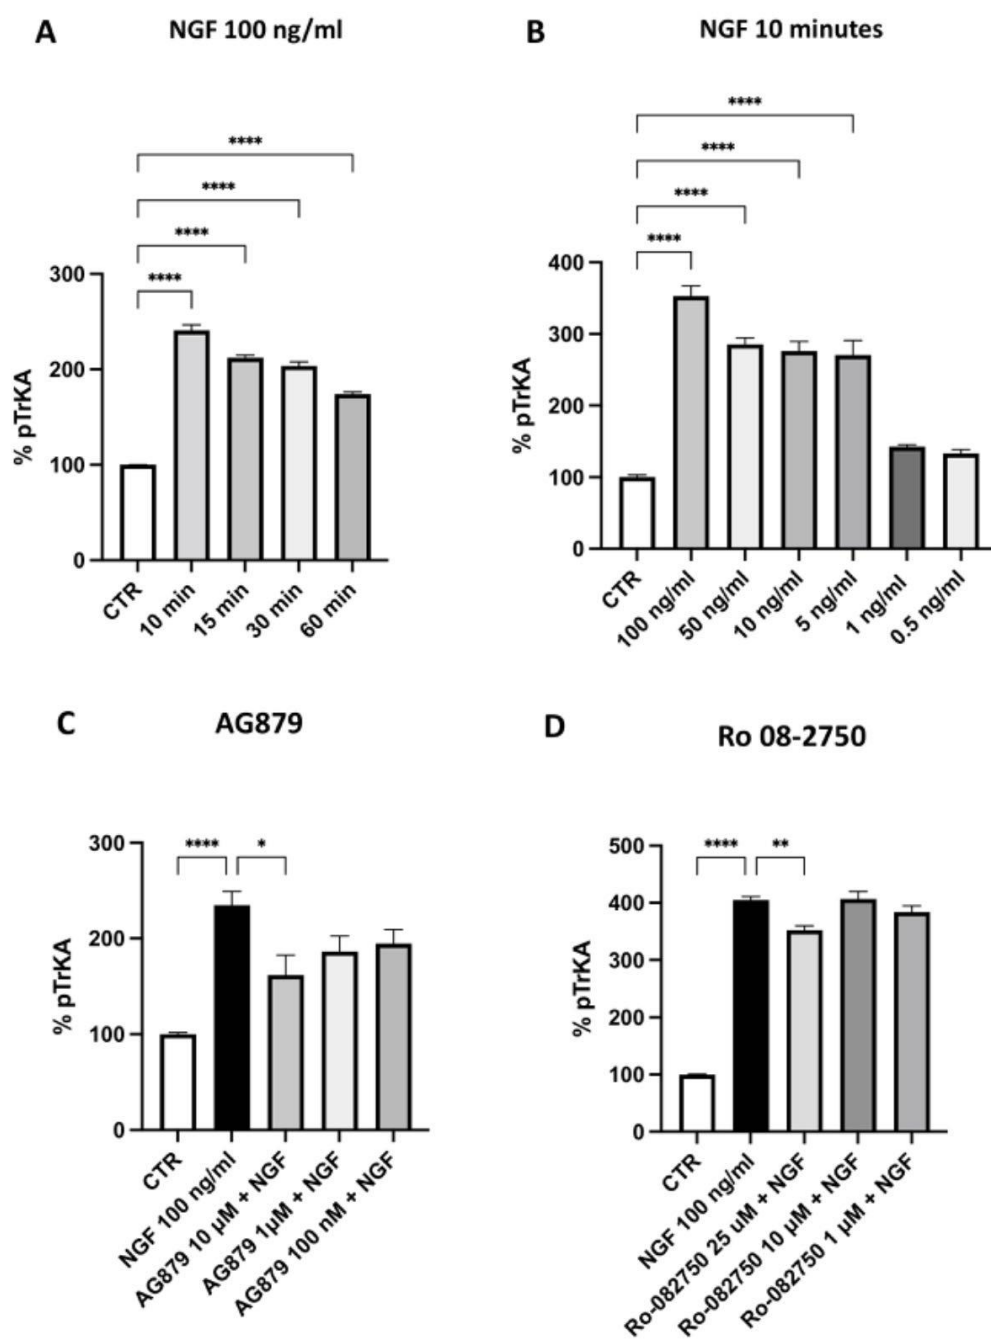

**Figure S1.** Time (A) and concentration (B) dependency of NGF for TrkA receptor activation in SH-SY5Y neuroblastoma cells and inhibition by two reference compounds (C and D). Each value represents the mean  $\pm$  S.E.M. of independent experiments with respect to the control (100%). \*\*\*\* $p < 0.0001$ , \*\* $p \leq 0.01$ , \* $p \leq 0.05$ ; Dunnett's Multiple Comparison post-hoc test (A) and Tukey's Multiple Comparison post-hoc test (B),  $n = 3$ .
